# Supplementary material for: Comparing Prognosis for BRCA1, BRCA2, and Non-BRCA Breast Cancer
Source: MDPI journal article supplement (doi:10.3390/cancers15235699), 2023-12-03
Supplement: s1 [file s1]

**Table S1. Cox Regression**

| Case Processing Summary     |                                                       |     |         |
|-----------------------------|-------------------------------------------------------|-----|---------|
|                             |                                                       | N   | Percent |
| Cases available in analysis | Event <sup>a</sup>                                    | 45  | 6.6%    |
|                             | Censored                                              | 0   | 0.0%    |
|                             | Total                                                 | 45  | 6.6%    |
| Cases dropped               | Cases with missing values                             | 639 | 93.4%   |
|                             | Cases with negative time                              | 0   | 0.0%    |
|                             | Censored cases before the earliest event in a stratum | 0   | 0.0%    |
|                             | Total                                                 | 639 | 93.4%   |
| Total                       |                                                       | 684 | 100.0%  |

a. Dependent Variable: Invasive Disease-Free Survival (months)

| Categorical Variable Codings <sup>a,c,d,e</sup> |                   |           |     |     |     |
|-------------------------------------------------|-------------------|-----------|-----|-----|-----|
|                                                 |                   | Frequency | (1) | (2) | (3) |
| Subtype <sup>b</sup>                            | 1=Luminal A       | 27        | 0   | 0   | 0   |
|                                                 | 2=Luminal B       | 6         | 1   | 0   | 0   |
|                                                 | 3=HER2 enriched   | 2         | 0   | 1   | 0   |
|                                                 | 4=Triple Negative | 10        | 0   | 0   | 1   |
| Mastectomy <sup>b</sup>                         | 0=No              | 28        | 0   |     |     |
|                                                 | 1=Yes             | 17        | 1   |     |     |
| Oophorectomy <sup>b</sup>                       | 0=No              | 17        | 0   |     |     |
|                                                 | 1=Yes             | 28        | 1   |     |     |
| mastectomy_and_oophorectomy <sup>b</sup>        | 0=No              | 31        | 0   |     |     |
|                                                 | 1=Yes             | 14        | 1   |     |     |

a. Category variable: Subtype

b. Indicator Parameter Coding

c. Category variable: Mastectomy

d. Category variable: Oophorectomy

e. Category variable: mastectomy\_and\_oophorectomy

## Block 1: Method = Forward Stepwise (Conditional LR)

| Variables in the Equation |       |      |       |    |      |        |                     |       |
|---------------------------|-------|------|-------|----|------|--------|---------------------|-------|
|                           | B     | SE   | Wald  | df | Sig. | Exp(B) | 95.0% CI for Exp(B) |       |
|                           |       |      |       |    |      |        | Lower               | Upper |
| Step 1 Oophorectomy       | -.899 | .327 | 7.552 | 1  | .006 | 407    | .215                | .773  |

**Variables not in the Equation<sup>a</sup>**

|        |                             | Score | df | Sig. |
|--------|-----------------------------|-------|----|------|
| Step 1 | Mastectomy                  | .127  | 1  | .722 |
|        | mastectomy_and_oophorectomy | 2.646 | 1  | .104 |
|        | Subtype                     | .098  | 3  | .992 |
|        | Subtype(1)                  | .009  | 1  | .926 |
|        | Subtype(2)                  | .031  | 1  | .860 |
|        | Subtype(3)                  | .059  | 1  | .809 |
|        | Age_diagnosis               | .480  | 1  | .488 |

a. Residual Chi Square = 6.011 with 6 df Sig. = .422

## Cox Regression

**Case Processing Summary**

|                             |                                                       | N   | Percent |
|-----------------------------|-------------------------------------------------------|-----|---------|
| Cases available in analysis | Event <sup>a</sup>                                    | 24  | 3.5%    |
|                             | Censored                                              | 213 | 31.1%   |
|                             | Total                                                 | 237 | 34.6%   |
| Cases dropped               | Cases with missing values                             | 447 | 65.4%   |
|                             | Cases with negative time                              | 0   | 0.0%    |
|                             | Censored cases before the earliest event in a stratum | 0   | 0.0%    |
|                             | Total                                                 | 447 | 65.4%   |
| Total                       |                                                       | 684 | 100.0%  |

a. Dependent Variable: Overall Survival (meses)

**Categorical Variable Codings<sup>a,c,d,e</sup>**

|                                          |                   | Frequency | (1) | (2) | (3) |
|------------------------------------------|-------------------|-----------|-----|-----|-----|
| Subtype <sup>b</sup>                     | 1=Luminal A       | 139       | 0   | 0   | 0   |
|                                          | 2=Luminal B       | 18        | 1   | 0   | 0   |
|                                          | 3=HER2 enriched   | 4         | 0   | 1   | 0   |
|                                          | 4=Triple Negative | 76        | 0   | 0   | 1   |
| Mastectomy <sup>b</sup>                  | 0=No              | 78        | 0   |     |     |
|                                          | 1=Yes             | 159       | 1   |     |     |
| Oophorectomy <sup>b</sup>                | 0=No              | 55        | 0   |     |     |
|                                          | 1=Yes             | 182       | 1   |     |     |
| mastectomy_and_oophorectomy <sup>b</sup> | 0=No              | 96        | 0   |     |     |
|                                          | 1=Yes             | 141       | 1   |     |     |

a. Category variable: Subtype

b. Indicator Parameter Coding

c. Category variable: Mastectomy

d. Category variable: Oophorectomy

e. Category variable: mastectomy\_and\_oophorectomy

## Block 1: Method = Forward Stepwise (Conditional LR)

**Variables in the Equation**

|                   | B      | SE   | Wald   | df | Sig. | Exp(B) | 95.0% CI for Exp(B) |       |
|-------------------|--------|------|--------|----|------|--------|---------------------|-------|
|                   |        |      |        |    |      |        | Lower               | Upper |
| Step 1 Mastectomy | -1.624 | .449 | 13.067 | 1  | .000 | .197   | .082                | .475  |

**Variables not in the Equation<sup>a</sup>**

|        |                             | Score | df | Sig. |
|--------|-----------------------------|-------|----|------|
| Step 1 | Oophorectomy                | 3.658 | 1  | .056 |
|        | mastectomy_and_oophorectomy | .093  | 1  | .760 |
|        | Subtype                     | 5.099 | 3  | .165 |
|        | Subtype(1)                  | 3.822 | 1  | .051 |
|        | Subtype(2)                  | .506  | 1  | .477 |
|        | Subtype(3)                  | .174  | 1  | .677 |
|        | Age_diagnosis               | .155  | 1  | .693 |

a. Residual Chi Square = 10.327 with 6 df Sig. = .112
